# Supplementary material
Source: publisher figshare collection journal article supplement (https://karger.figshare.com/ndownloader/files/14983502)
Supplement: Supplementary file 1 [file 14983502]

**Table S2**

Correlations between gene expression patterns in chicken gonads at day 6 (upper triangle) and 11 (lower triangle) of the embryonic development.

| Gene | *WNT4* | *SOX9* | *IGF1R* | *IGF1* | *ESR1* | *DMRT3* | *DMRT1E* | *DMRT1* | *CYP19* | *BMP4* | *AMH* | *RSPO1* | *HINTW* |
| --- | --- | --- | --- | --- | --- | --- | --- | --- | --- | --- | --- | --- | --- |
| *WNT4* |  | -0.12 | 0.33 | 0.60** | -0.01 | -0.05 | -0.02 | 0.02 | 0.91*** | -0.18 | 0.6** | -0.04 | 0.05 |
| *SOX9* | 0.13 |  | -0.14 | 0.00 | -0.03 | -0.01 | -0.13 | 0.07 | -0.13 | 0.79*** | 0.00 | 0.88*** | 0.10 |
| *IGF1R* | 0.41* | 0.22 |  | 0.20 | 0.16 | 0.27 | 0.202 | 0.01 | 0.48* | 0.1 | 0.2 | -0.3 | 0.24 |
| *IGF1* | 0.01 | 0.03 | 0.46* |  | -0.03 | 0.06 | 0.07 | 0.29 | 0.67*** | -0.16 | 1.0*** | 0.01 | 0.11 |
| *ESR1* | -0.07 | -0.08 | -0.24 | -0.22 |  | 0.07 | -0.06 | 0.03 | 0.17 | -0.07 | -0.02 | -0.04 | -0.01 |
| *DMRT3* | 0.1 | 0.11 | 0.76*** | 0.45* | -0.28 |  | 0.01 | 0.17 | 0.01 | -0.17 | 0.06 | -0.13 | -0.03 |
| *DMRT1E* | 0.01 | 0.63*** | 0.56** | 0.49* | -0.3 | 0.58** |  | -0.06 | -0.05 | -0.14 | 0.07 | -0.11 | 0.02 |
| *DMRT1* | -0.08 | -0.08 | -0.19 | 0.03 | 0.04 | -0.07 | 0.24 |  | -0.01 | -0.04 | 0.29 | -0.07 | -0.1 |
| *CYP19* | 0.96*** | 0.05 | 0.33 | 0.01 | -0.1 | 0.07 | -0.05 | -0.04 |  | -0.16 | 0.67*** | -0.03 | 0.07 |
| *BMP4* | 0.84*** | 0.57 | 0.47* | 0.1 | -0.03 | 0.17 | 0.35 | -0.1 | 0.79*** |  | -0.16 | 0.82*** | 0.24 |
| *AMH* | 0.01 | 0.03 | 0.46* | 1*** | -0.22 | 0.46* | 0.49* | 0.03 | 0.01 | 0.1 |  | -0.00 | 0.11 |
| *RSPO1* | 0.02 | 0.35 | 0.04 | -0.01 | -0.05 | -0.13 | 0.15 | 0.02 | -0.08 | 0.01 | -0.02 |  | 0.44* |
| *HINTW* | 0.97*** | 0.18 | 0.46* | 0.1 | -0.08 | 0.17 | 0.08 | -0.06 | 0.95*** | 0.86*** | 0.1 | -0.01 |  |

Significant correlations at P< 0.05, 0.01, and 0.001 are depicted by *, **, and ***, respectively.
